# Supplementary material for: Addressing Cervical Cancer Screening Through Self-Sampling and HPV Testing Among Under-Screened Women: A Case Study in the Decentralized Portuguese Setting
Source: bioRxiv or medRxiv preprint supplement (doi:10.1101/2024.04.05.24305323), 2024-04-11
Supplement: Supplementary file [file media-1.pdf]

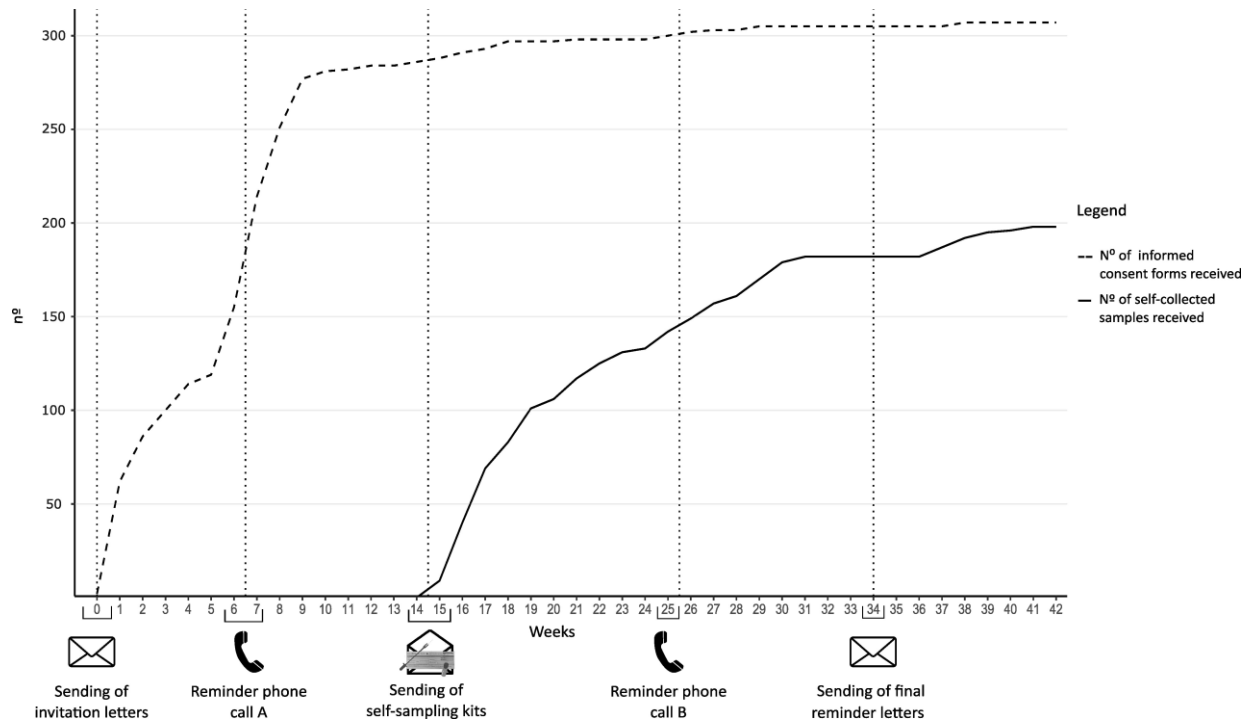

**Figure S1 – Correlation Between the Reception of Informed Consents, indicative of Participation Acceptance, and the Subsequent Return of Self-Collected Samples.**

**Table S1 – Reasons for Women's Ineligibility to Participate in the Study: Responses from the Invitation Letter and Reminder Phone Calls.**

| Factors Contributing to Women's Ineligibility for Participation in the Study | n(%)            |
|------------------------------------------------------------------------------|-----------------|
| <b>Did not fulfil the study criteria</b>                                     |                 |
| Recent participation in CC screening program                                 | 43(37.7)        |
| Hysterectomised                                                              | 32(28.0)        |
| Pregnant                                                                     | 5(4.4)          |
| <b>Other Reasons</b>                                                         |                 |
| Unable to perform self-sampling due to underlying health conditions          | 5(4.4)          |
| Deceased                                                                     | 2(1.8)          |
| Absence from the country                                                     | 19(16.7)        |
| <b>Insufficient address/contacts</b>                                         | <b>8(7)</b>     |
| <b>Total</b>                                                                 | <b>114(100)</b> |
